# Supplementary material for: Ion transport in a class of imidazole-based liquid/solid protic ionics
Source: Royal Society of Chemistry journal article supplement (doi:10.1039/c2cp41027c), 2012-01-01
Supplement: c2cp41027c.pdf [file c2cp41027c.pdf]

**Electronic Supplementary Information for the Paper:**

***Ion Transport in a Class of Imidazole-Based Liquid / Solid Protic Ionics***

V. Tricoli, G. Orsini and M. Anselmi

*Department of Chemical Engineering and Materials Science, University of Pisa, largo L. Lazzarino 1, 56122, Pisa, ITALY*

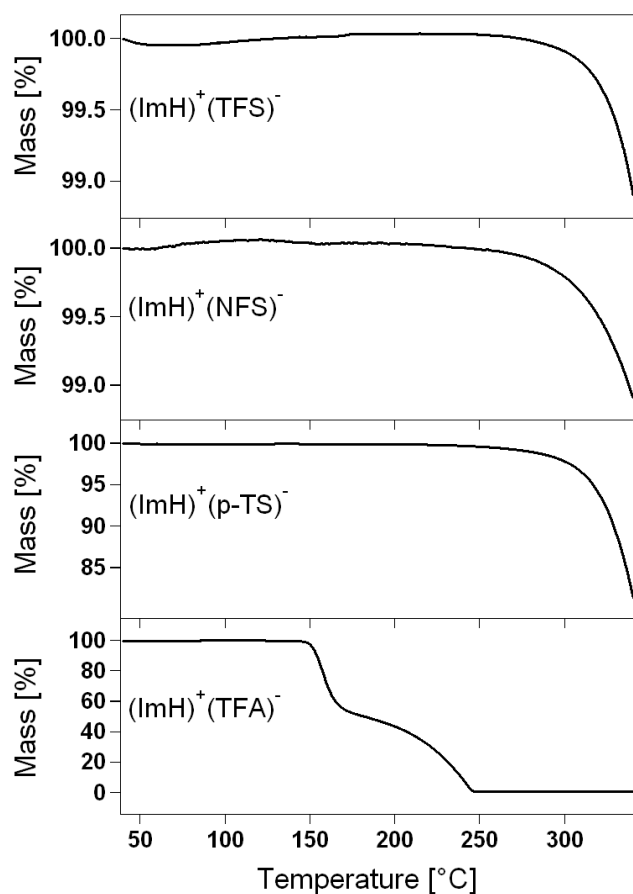

**Fig. S1** Thermogravimetric curves for the imidazole-based PICs.

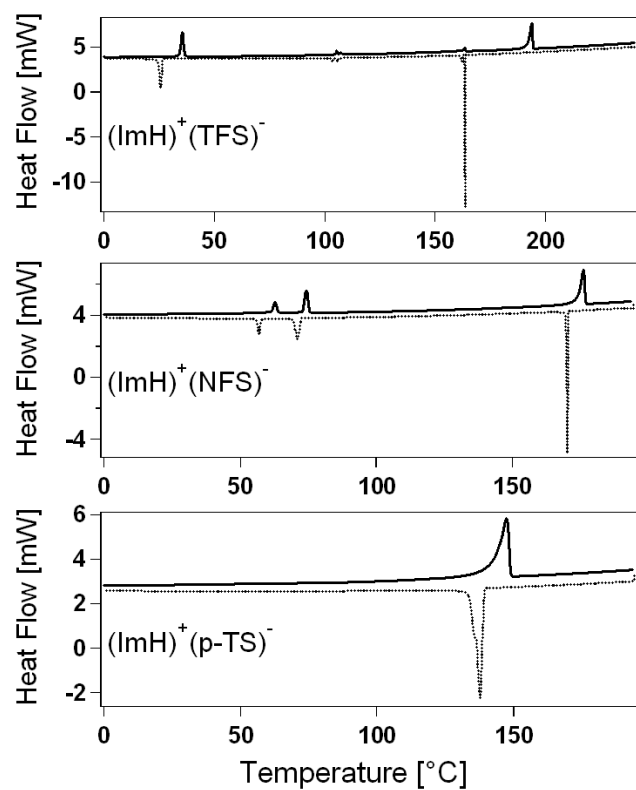

**Fig. S2** DSC plots for the thermally stable imidazole-based PICs. Solid lines: starting heating curves. Dotted lines: cooling curves.

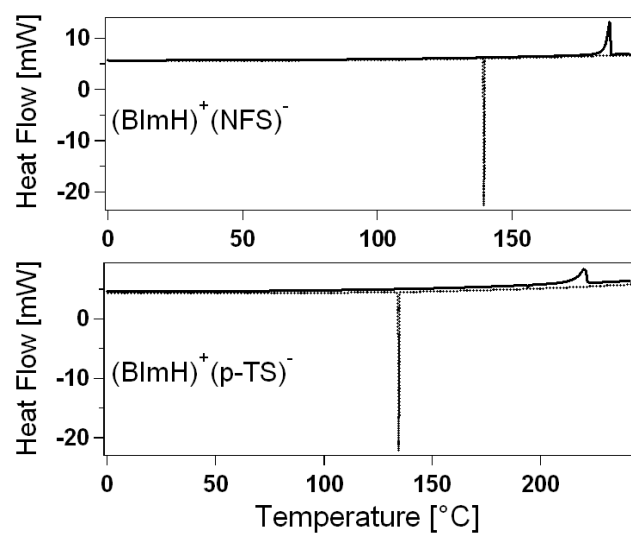

**Fig. S3** DSC plots for the thermally stable benzimidazole-based PICs (plot for sample  $(\text{BImH})^+(\text{TFS})^-$  is shown in Fig. 4 of the paper). Solid lines: starting heating curves. Dotted lines: cooling curves.
